# Supplementary material for: Lowering the C–H bond activation barrier of methane by means of SAC@Cu(111): periodic DFT investigations
Source: Royal Society of Chemistry journal article supplement (doi:10.1039/d1nj04525c), 2021-11-11
Supplement: d1nj04525c1.pdf [file d1nj04525c1.pdf]

# Lowering C-H Bond Activation Barrier of Methane by Means of SAC@Cu(111): Periodic DFT Investigations

Meema Bhati,<sup>a b</sup> Jignesh Dhumal,<sup>a</sup> and Kavita Joshi<sup>\*a b</sup>

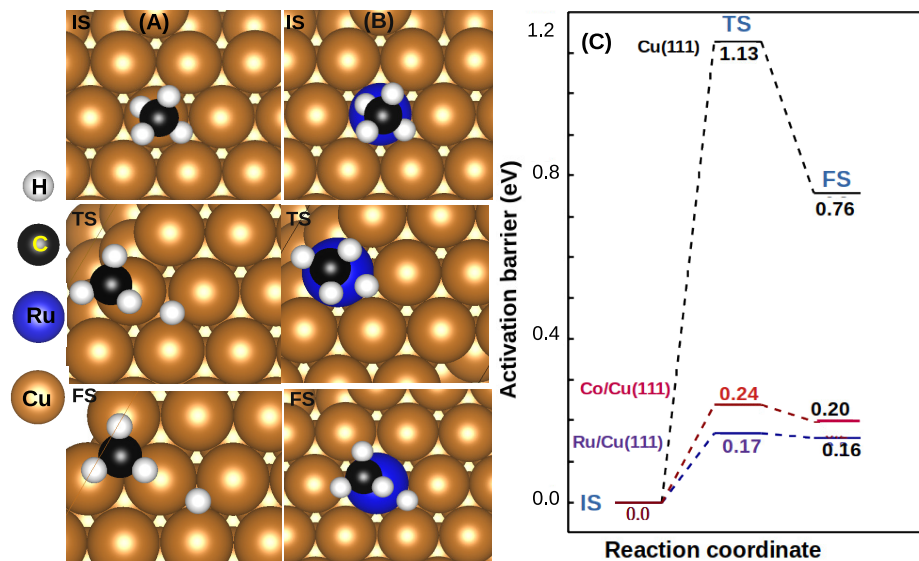

Fig. 1 Chemisorption and physisorption of methane on various SACs in term of adsorption energy as a function of (A) C-H bond length and (B) M-C bond length

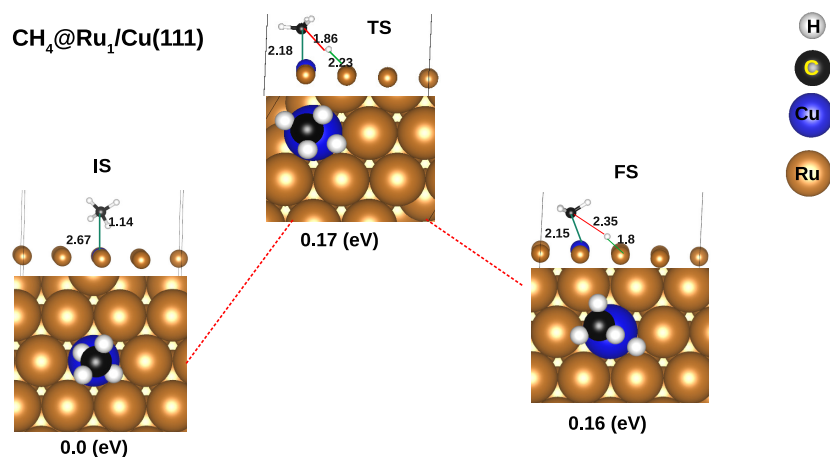

Fig. 2 Top and side view for the first C-H bond dissociation ( $\text{CH}_4 \rightarrow \text{CH}_3 + \text{H}$ ) reaction path on Ru/Cu(111) SAC

<sup>a</sup> Physical and Materials Chemistry Division, CSIR-National Chemical Laboratory, Dr. Homi Bhabha Road, Pashan, Pune-411008, India.

<sup>b</sup> Academy of Scientific and Innovative Research (AcSIR), Email:k.joshi@ncl.res.in; kavita.p.joshi@gmail.com

† Electronic Supplementary Information (ESI) available: [details of any supplementary information available should be included here]. See DOI: 00.0000/00000000.

**Table 1** M-C, C-H bond length and corresponding adsorption energy (eV) for TM/Cu(111) surfaces

| Dopant(TM <sub>1</sub> )<br>Group | b <sub>C-H</sub> (Å) | b <sub>M-C</sub> (Å) | E <sub>ads</sub> (eV) | E <sub>act</sub> | E <sub>act</sub> (ZPC) | E <sub>rec</sub> (eV) |       |       |       |
|-----------------------------------|----------------------|----------------------|-----------------------|------------------|------------------------|-----------------------|-------|-------|-------|
|                                   | 4                    | 5                    | 6                     | 7                | 8                      | 9                     | 10    | 11    | 12    |
| TM <sub>1</sub> /dopant           | Ti                   | V                    | Cr                    | Mn               | Fe                     | Co                    | Ni    | Cu    | Zn    |
| C-H (Å)                           | 1.121                | 1.124                | 1.124                 | 1.124            | 1.135                  | 1.130                 | 1.104 | 1.103 | 1.101 |
| M-C (Å)                           | 2.51                 | 2.46                 | 2.44                  | 2.4              | 2.56                   | 2.67                  | 3.0   | 3.14  | 3.2   |
| E <sub>ads</sub>                  | -0.63                | -0.62                | -0.58                 | -0.53            | -0.47                  | -0.41                 | -0.35 | -0.34 | -0.27 |
| TM <sub>1</sub> /dopant           | Zr                   |                      | Mo                    | Tc               | Ru                     | Rh                    | Pd    | Ag    |       |
| C-H (Å)                           | 1.117                |                      | 1.126                 | 1.122            | 1.141                  | 1.123                 | 1.104 | 1.101 |       |
| M-C (Å)                           | 2.71                 |                      | 2.57                  | 2.58             | 2.6                    | 2.9                   | 3.1   | 3.2   |       |
| E <sub>ads</sub>                  | -0.74                |                      | -0.64                 | 0.57             | -0.51                  | -0.40                 | -0.34 | -0.32 |       |
| TM <sub>1</sub> /dopant           |                      |                      |                       | 5d               |                        | Ir                    | Pt    | Au    |       |
| C-H (Å)                           |                      |                      |                       |                  |                        | 1.102                 | 1.101 | 1.101 |       |
| M-C (Å)                           |                      |                      |                       |                  |                        | 3.3                   | 3.4   | 3.1   |       |
| E <sub>ads</sub>                  |                      |                      |                       |                  |                        | -0.39                 | -0.35 | -0.31 |       |

**Table 2** Mulliken charges on the dopant and Cu atom of SACs and Cu(111), and carbon atom of methane before and after methane adsorption on SACs and Cu(111) surfaces.

| Dopant<br>element        | Charge on<br>dopant@SAC | charge on dopant<br>when CH <sub>4</sub> is adsorbed | charge on<br>C atom | group |
|--------------------------|-------------------------|------------------------------------------------------|---------------------|-------|
| Ti                       | 0.52                    | 0.32                                                 | -1.19               |       |
| V                        | 0.27                    | 0.08                                                 | -1.17               |       |
| Cr                       | -0.14                   | -0.20                                                | -1.16               |       |
| Mn                       | -0.28                   | -0.03                                                | -1.16               | 3d    |
| Fe                       | -0.34                   | -0.13                                                | -1.12               |       |
| Co                       | -0.36                   | -0.16                                                | -1.10               |       |
| Ni                       | -0.29                   | -0.09                                                | -1.13               |       |
| Cu                       | 0.15                    | -0.01                                                | -1.13               |       |
| Mo                       | -0.54                   | -0.58                                                | -1.18               |       |
| Ru                       | -0.64                   | -0.65                                                | -1.15               | 4d    |
| Rh                       | -0.59                   | -0.65                                                | -1.16               |       |
| CH <sub>4</sub> molecule | -                       | -                                                    | -1.14               |       |
